# Supplementary material for: IQGAP1 Is Involved in Post-Ischemic Neovascularization by Regulating Angiogenesis and Macrophage Infiltration
Source: PubMed Central journal article supplement (PMC2955540; doi:10.1371/journal.pone.0013440), 2010-10-15

**Figure S2**

**Ischemic tissues**

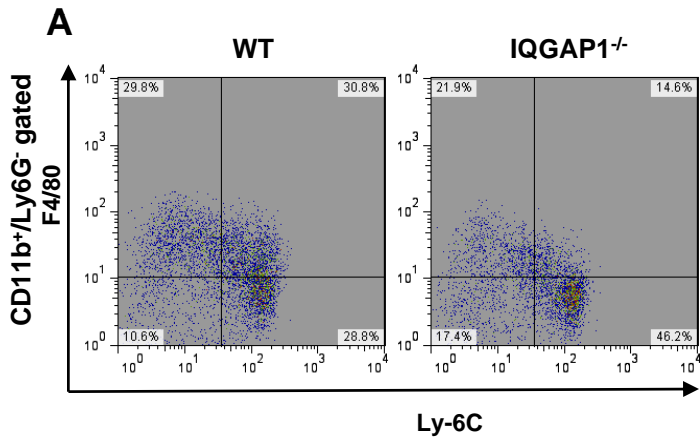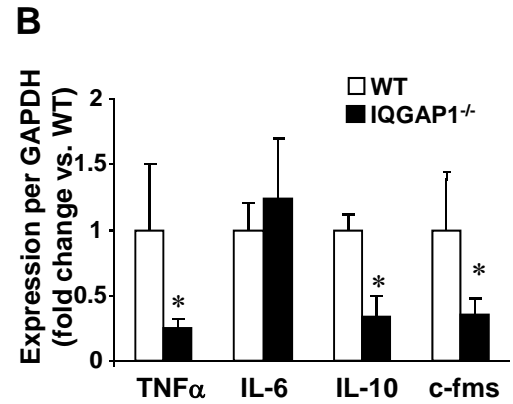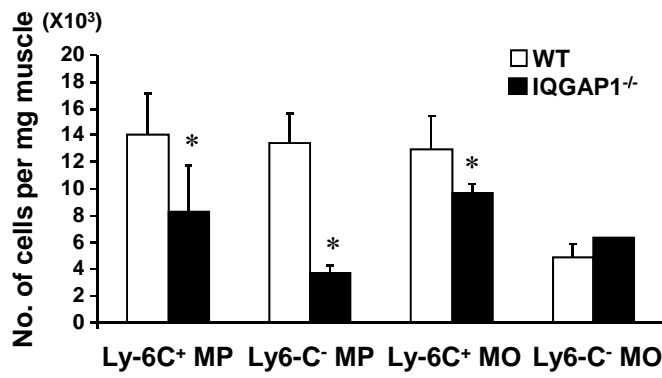

**Peritoneal macrophages**

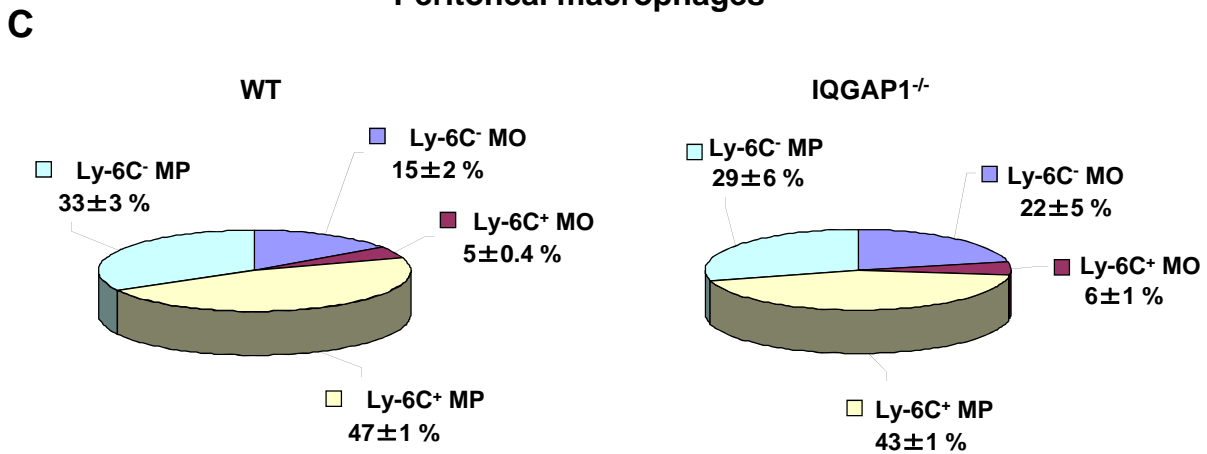

Supplement: pone.0013440.s002.pdf [file pone.0013440.s002.pdf]
