# Supplementary material for: IQGAP1 Is Involved in Post-Ischemic Neovascularization by Regulating Angiogenesis and Macrophage Infiltration
Source: PubMed Central journal article supplement (PMC2955540; doi:10.1371/journal.pone.0013440), 2010-10-15

Figure S3

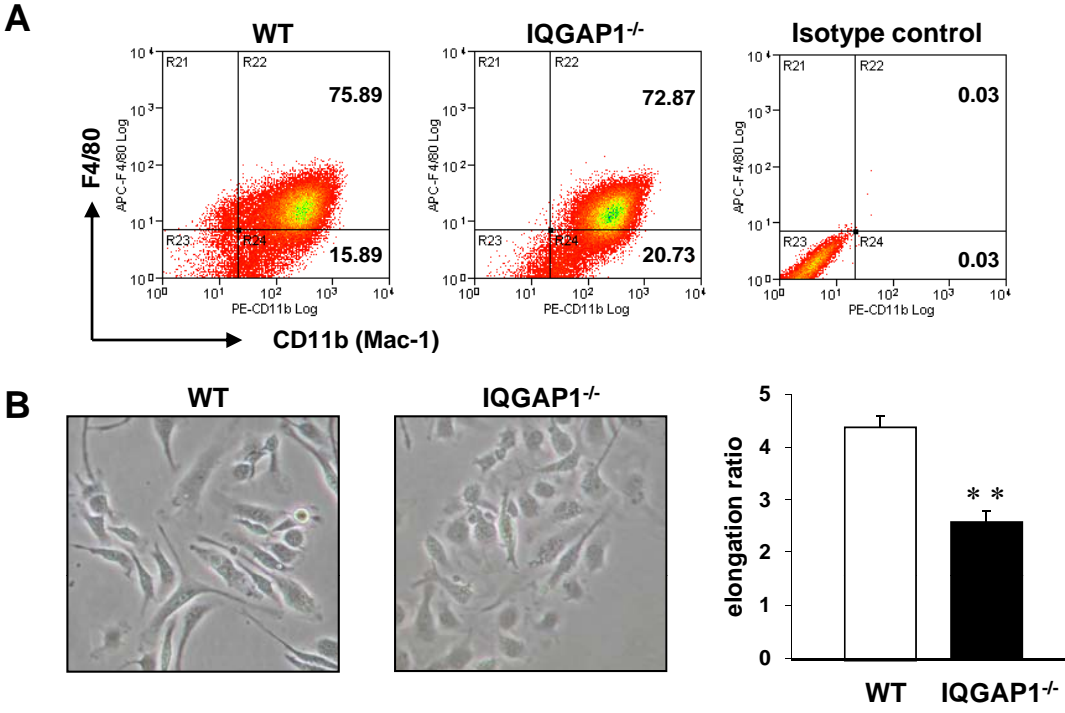

Supplement: pone.0013440.s003.pdf [file pone.0013440.s003.pdf]
